# Supplementary material for: A layer-stacked NiO nanowire/nanosheet homostructure for electrochromic smart windows with ultra-large optical modulation
Source: Royal Society of Chemistry journal article supplement (doi:10.1039/d3nr01211e), 2023-01-01
Supplement: d3nr01211e1.pdf [file d3nr01211e1.pdf]

**Supplementary Information**

**Layer-Stacked NiO Nanowire/Nanosheet Homostructure for Electrochromic**

**Smart Windows with Ultra-Large Optical Modulation**

Yi Gao,<sup>a</sup> Pengyang Lei,<sup>a</sup> Siyu Zhang,<sup>a</sup> Huanhuan Liu,<sup>a</sup> Chengyu Hu,<sup>a</sup> Zhu Kou,<sup>a</sup> Jinhui Wang\*<sup>a</sup> and Guofa Cai\*<sup>a</sup>

<sup>a</sup>Key Laboratory for Special Functional Materials of Ministry of Education, National & Local Joint Engineering Research Center for High-efficiency Display and Lighting Technology, School of Materials and Engineering, and Collaborative Innovation Center of Nano Functional Materials and Applications, Henan University, Kaifeng 475004, China

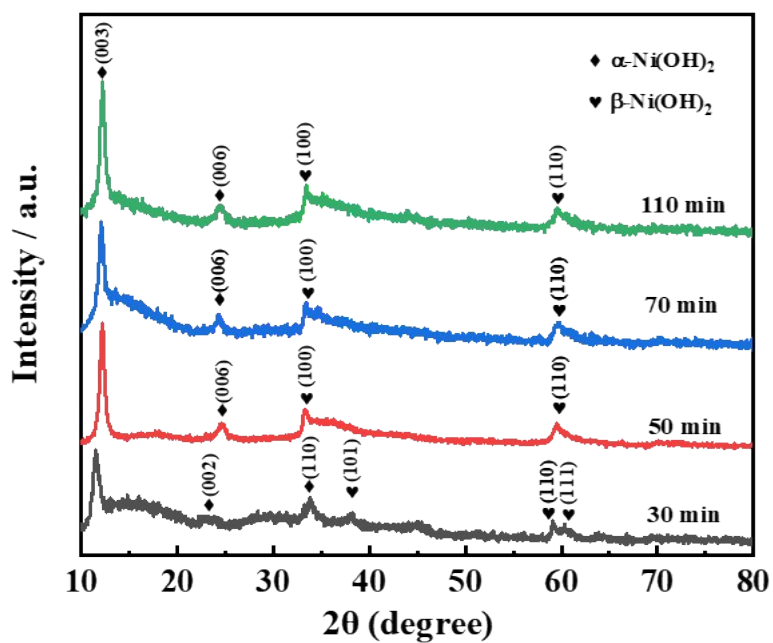

**Fig. S1** XRD patterns of grown Ni(OH)<sub>2</sub>.

The synthesized product is mainly a mixture of  $\alpha$ -Ni(OH)<sub>2</sub> and  $\beta$ -Ni(OH)<sub>2</sub>, which is confirmed by X-ray diffraction (XRD) patterns (Fig. S1). With the increase in reaction time, Ni(OH)<sub>2</sub> grows along the (003) plane of the  $\alpha$  phase.

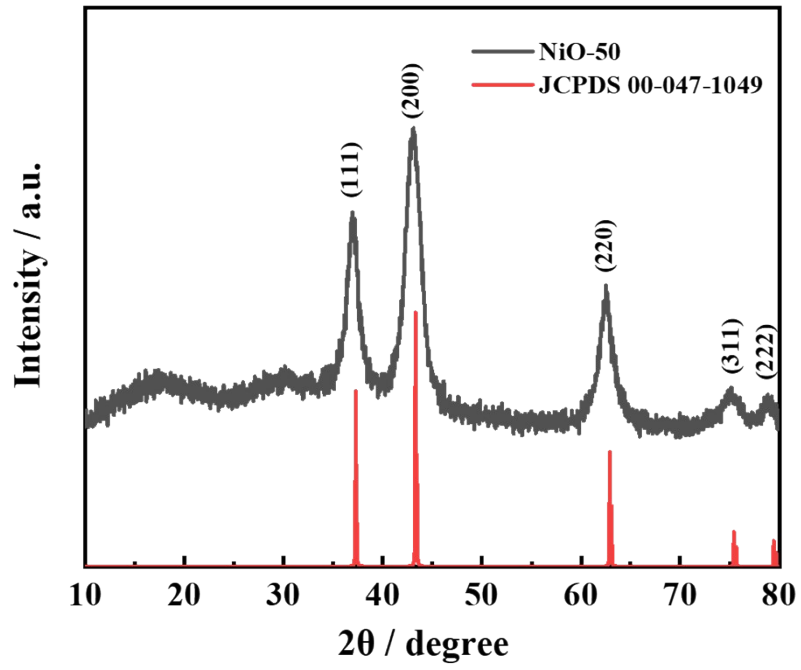

Fig. S2 XRD patterns of as-prepared NiO-50 film.

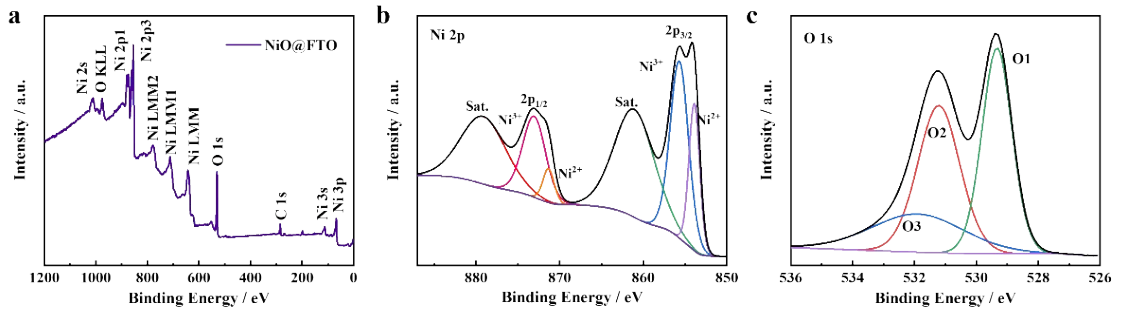

**Fig. S3** XPS spectra of NiO-50 film. (a) Full survey spectrum. (b) Ni 2p region. (c) O 1s region.

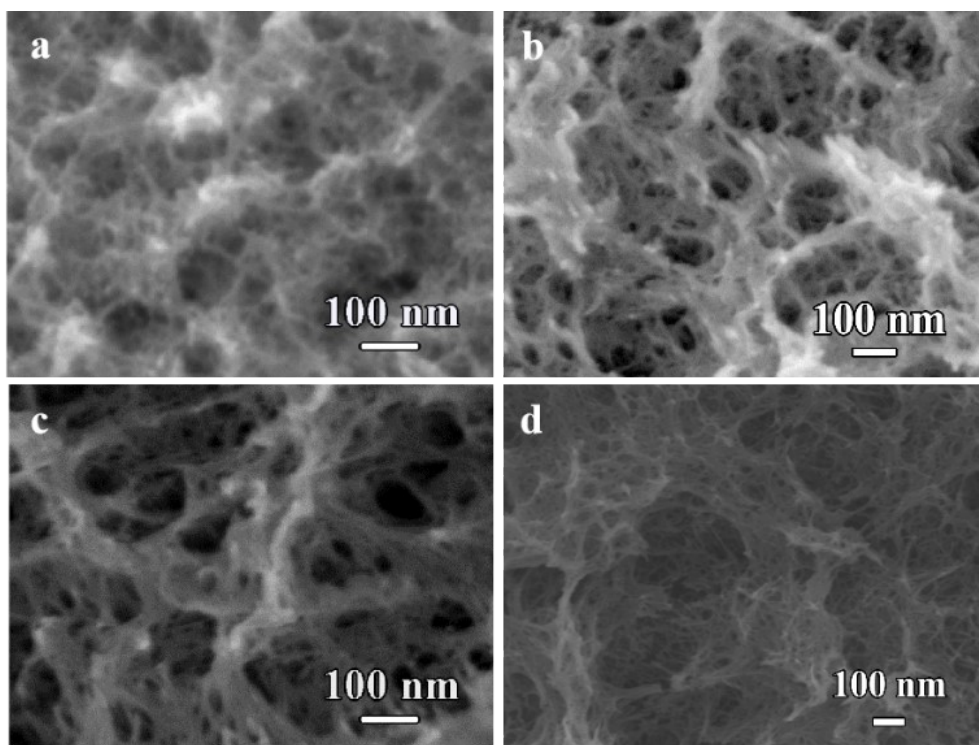

**Fig. S4** SEM images of NiO films were hydrothermally grown at (a) 35, (b) 70, (c) 90, and (d) 110 min.

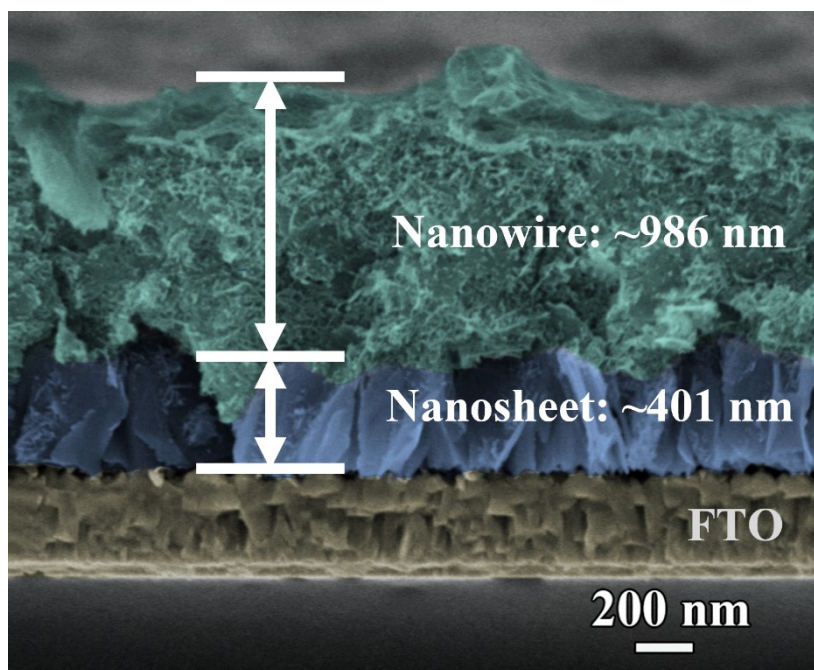

**Fig. S5** Cross-section of NiO-110 thin film.

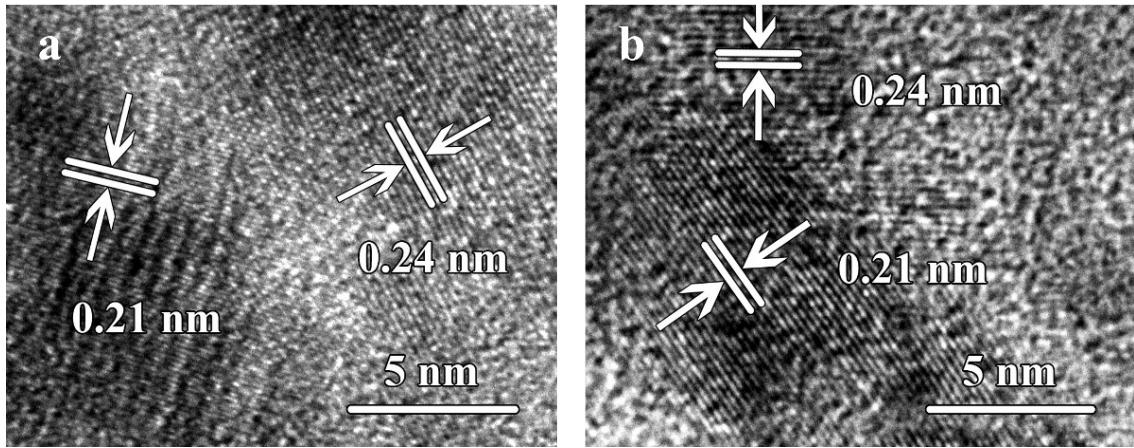

**Fig. S6** HRTEM images of NiO-30 and NiO-50 films, respectively.

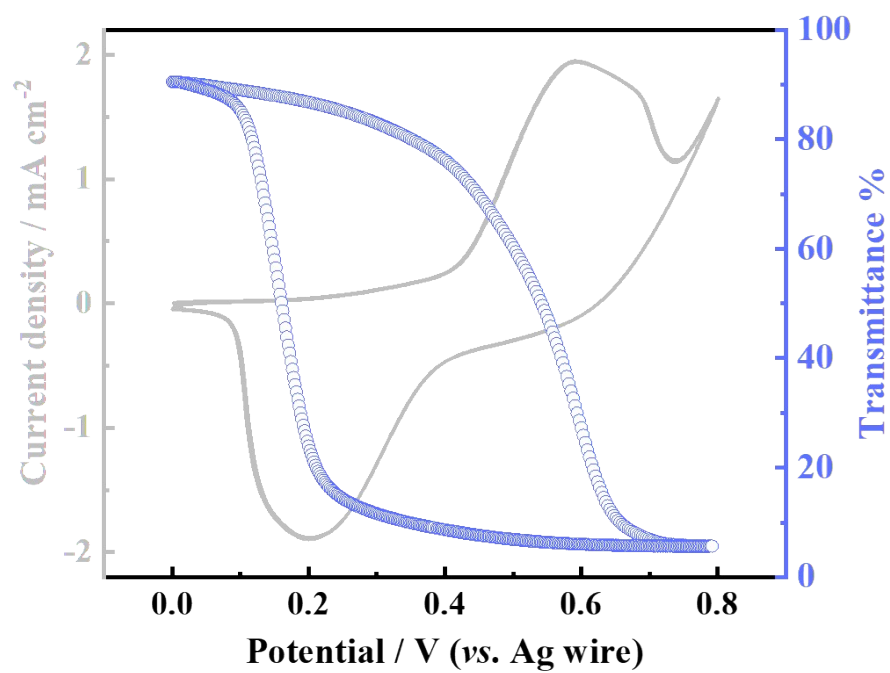

**Fig. S7** CV curve and in-situ dynamic transmission spectrum of d NiO-50 at 550 nm at a scan rate of 10 mV s<sup>-1</sup>.



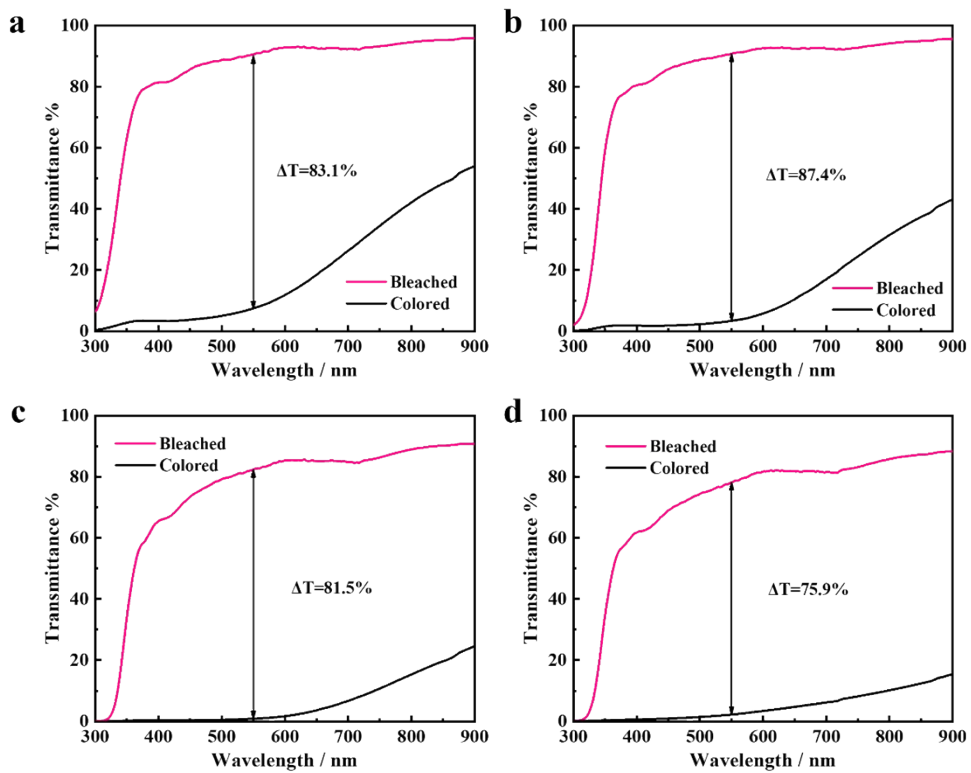

**Fig. S8** Optical transmission spectra of (a) NiO-35, (b) NiO-70, (c) NiO-90, (d) NiO-110 films, respectively.

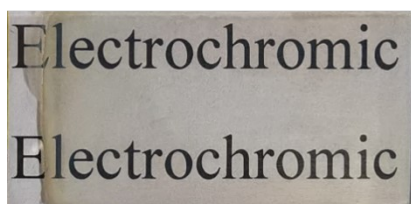

1 cm

**Bleached**

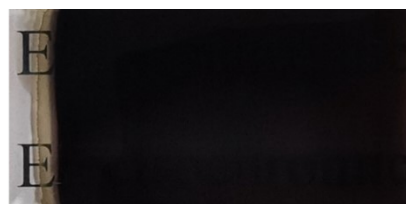

1 cm

**Colored**

**Fig. S9** Digital photos of the NiO film in bleached and colored states.

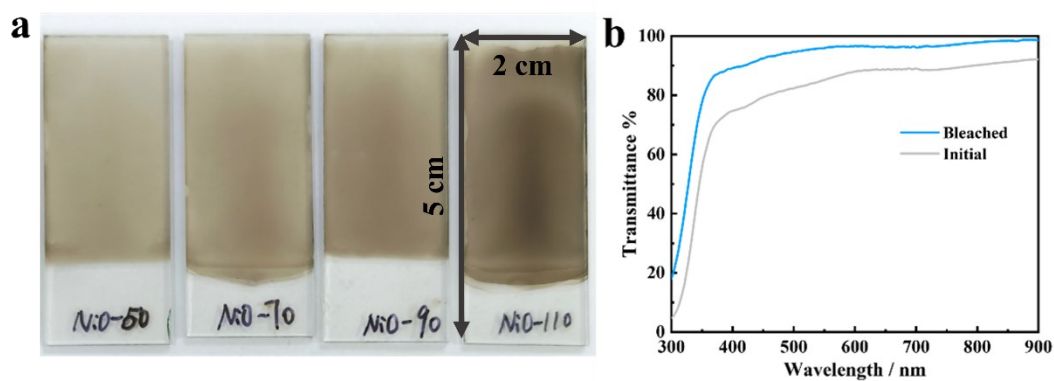

**Fig. S10** (a) Digital photos of the NiO-50 to NiO-110 films in their initial states; (b) The transmittance comparison of NiO-50 film in the bleached and initial states.

As shown in Fig. S10a, NiO films in their initial state show an intrinsic yellow color, wherein the color deepens with the NiO growth from NiO-50 to NiO-110. It is noted that the NiO transmittance in the bleached state is generally higher than that in the initial state by comparison of NiO-50 film in Fig. S10b, due to the existence of multiple valences in the initial state (Fig. S3b).

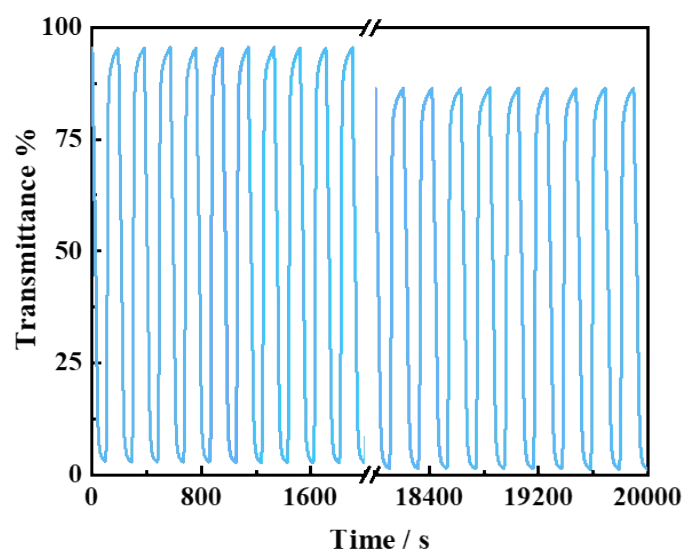

**Fig. S11** In situ transmission spectrum at 0 V and 0.7 V (vs. Ag wire) square wave potential for 100 s corresponding to the first and last ten cycles of NiO-50 in 1000 cycles.

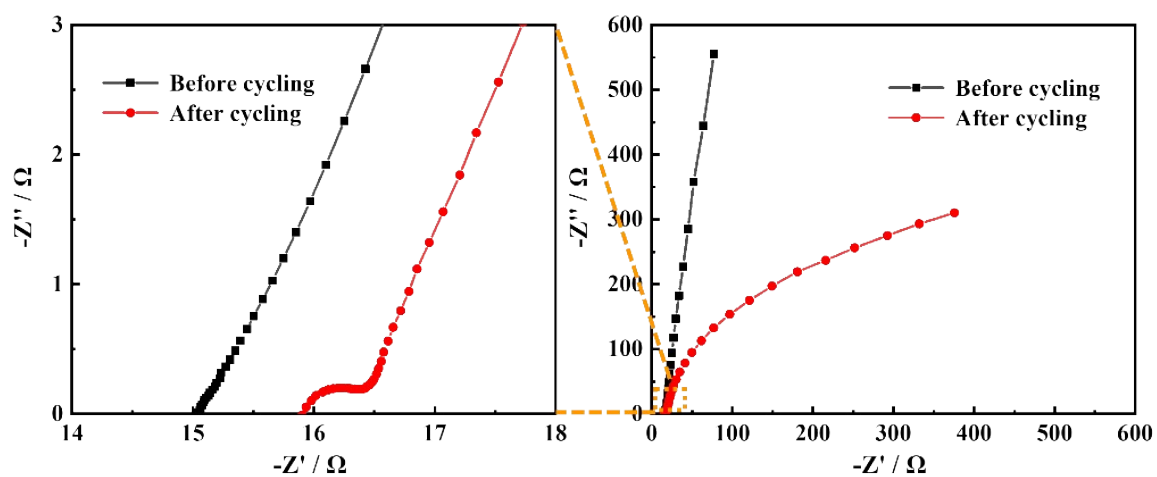

**Fig. S12** Nyquist plots of the NiO-50 film before and after cycling measurement by applying the frequency from 0.01 Hz to 100000 Hz.

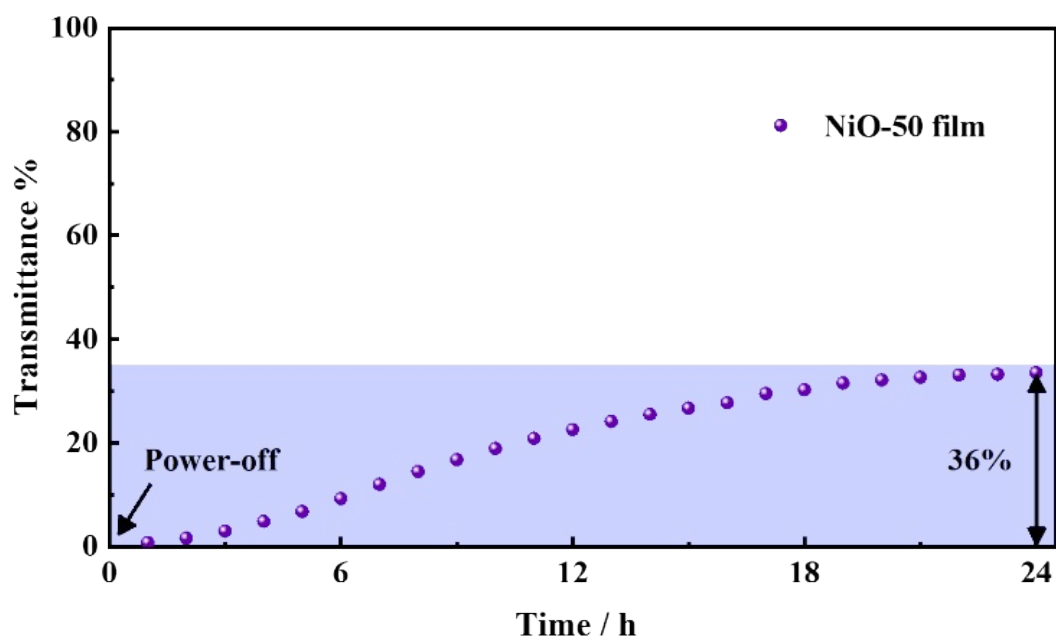

**Fig. S13** The transmittance spectrum of NiO-50 film at 550 nm after a coloring voltage of 0.7 V (vs. Ag wire) was applied.

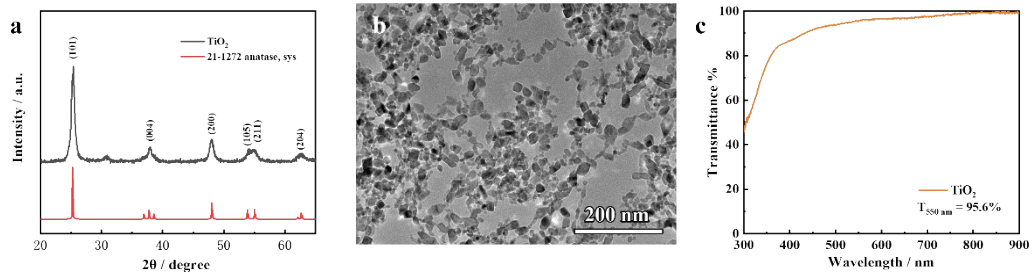

**Fig. S14** Characterization of TiO<sub>2</sub> nanoparticles film fabricated by electrostatic spraying method: (a) The XRD pattern of TiO<sub>2</sub> film on FTO substrate. (b) TEM image of TiO<sub>2</sub> nanoparticles. (c) The transmittance spectrum of TiO<sub>2</sub> film.

These results confirmed that the successful preparation of anatase-phase TiO<sub>2</sub> in the form of 10-45 nm nanoparticles.

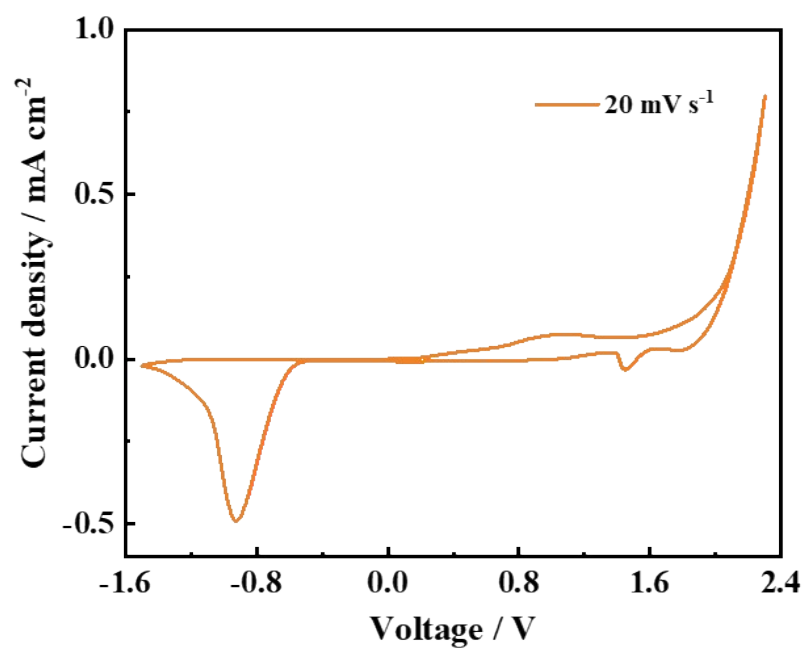

**Fig. S15** CV curve of the assembled electrochromic device at 20 mV s<sup>-1</sup>.



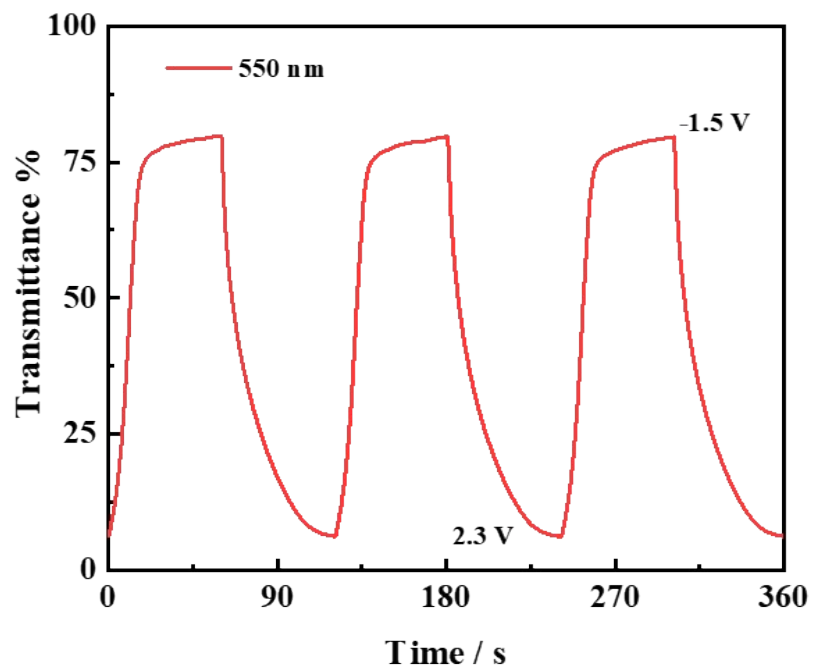

**Fig. S16** The in-situ transmittance response at 550 nm which was obtained by applying square wave voltages of -1.5 V and 2.3 V for 60 s.

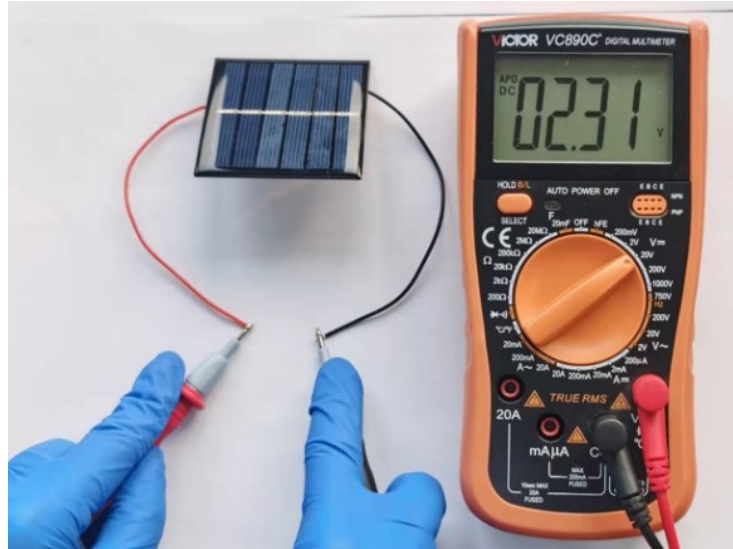

**Fig. S17** Demonstration of commercial silicon solar panels with an output voltage of 2.31 V.

**Table S1** Comparison of the response time of NiO film under different hydrothermal reaction times.

| Sample  | $t_b / s$ | $t_c / s$ |
|---------|-----------|-----------|
| NiO-30  | 3.4       | 4.3       |
| NiO-35  | 8.7       | 12        |
| NiO-50  | 9.5       | 12.2      |
| NiO-70  | 17.7      | 13.7      |
| NiO-90  | 14.1      | 12.9      |
| NiO-110 | 14        | 12.6      |

**Table S2** Comparison of electrochromic performance of NiO-50 and other NiO EC films.

| Method                                             | $\Delta T$ / % | $t_b, t_c$ / s | Cycling stability                                     | CE / $\text{cm}^2 \text{C}^{-1}$ | References                                                    |
|----------------------------------------------------|----------------|----------------|-------------------------------------------------------|----------------------------------|---------------------------------------------------------------|
| Sol-gel                                            | 51 (550 nm)    | 7/5            | 3000 (90% of retention)                               | 40                               | <i>J. Mater. Chem. C</i> , <b>2018</b> , 6, 4952              |
| Sol-gel                                            | 54.27 (450 nm) | 3.2/2.7        | -                                                     | 48.5                             | <i>Appl. Surf. Sci.</i> , <b>2021</b> , 537, 147902           |
| Template                                           | 78.5 (550 nm)  | 3.92/3.43      | 1000 (78% of retention)                               | 51.8                             | <i>Surf. Coat. Technol.</i> , <b>2018</b> , 337, 63           |
| Hot-filament metal-oxide vapor deposition (HFMOVD) | 60 (630 nm)    | 1.55/1.22      | 1000 (78.3% of retention)                             | 43.3                             | <i>Sol. Energy Mater. Sol. Cells</i> , <b>2013</b> , 112, 91  |
| Electrodeposition                                  | 76 (550 nm)    | 3/6            | 3000 (61% of retention)                               | 46                               | <i>Electrochim. Acta</i> , <b>2011</b> , 56, 1208             |
| E-beam evaporation                                 | 66 (630 nm)    | 6.3/4.4        | -                                                     | 55                               | <i>Sol. Energy Mater. Sol. Cells</i> , <b>2014</b> , 120, 109 |
| E-beam evaporation                                 | 27.2 (540 nm)  | -              | 800 (78% of retention)                                | 53.1                             | <i>J. Sci.: Adv. Mater. Devices</i> , <b>2017</b> , 2, 225    |
| Hydrothermal                                       | 67 (550 nm)    | 5.2/6.6        | 600 (40% of retention)                                | 92                               | <i>J. Mater. Chem. A</i> , <b>2013</b> , 1, 4286              |
| Chemical bath deposition                           | 36 (630 nm)    | 9.03/38.87     | 2000 (91.95% of retention)                            | 16.95                            | <i>ACS Appl. Mater. Interfaces</i> , <b>2021</b> , 13, 57403  |
| Radio frequency magnetron sputtering               | 67.6 (550 nm)  | 3.1/2.1        | 1000 (Activating all the time)                        | 51.6                             | <i>Appl. Surf. Sci.</i> , <b>2018</b> , 451, 104              |
| Solvothermal                                       | 63.6 (550 nm)  | 11.5/9.5       | 1000 (90.8% of retention) / 5000 (56.4% of retention) | 42.8                             | <i>Nano Energy</i> , <b>2015</b> , 12, 258                    |
| Hydrothermal                                       | 95 (550 nm)    | 5.4/9.8        | 700 (61% of retention)                                | 91.2                             | <i>Nanoscale Adv.</i> , <b>2022</b> , 4, 4748                 |
| Hydrothermal                                       | 77 (550 nm)    | 2/2.5          | 3000 (70% of retention)                               | 49                               | <i>Electrochim. Acta</i> , <b>2013</b> , 111, 86              |

|              |               |          |                              |      |                                                     |
|--------------|---------------|----------|------------------------------|------|-----------------------------------------------------|
| Hydrothermal | 40 (632.8 nm) | 1.8/2.7  | -                            | 63.2 | <i>J. Mater. Chem. A</i> , <b>2015</b> ,<br>3,20614 |
| Hydrothermal | 93.4 (550 nm) | 9.5/12.2 | 1000 (91.2% of<br>retention) | 72.1 | <b>This work</b>                                    |

**Table S3** Comparison of electrochromic performance of NiO-based EC devices.

| Device                                               | $\Delta T / \%$ | $t_b, t_c / s$ | Cycling | CE / $\text{cm}^2 \text{C}^{-1}$ | References                                                    |
|------------------------------------------------------|-----------------|----------------|---------|----------------------------------|---------------------------------------------------------------|
| NiO  TiO <sub>2</sub>                                | 74              | -              | -       | 61.5                             | <i>J. Phys. Chem. Lett.</i> ,<br><b>2023</b> , 14, 2284       |
| WO <sub>3</sub>   NiO                                | 75              | 10/13.1        | 100     | 131.9                            | <i>Nanoscale</i> , <b>2016</b> , 8,<br>348                    |
| AgNWs  NiO                                           | 14.3            | -              | 2000    | 51.9                             | <i>Adv. Energy Mater.</i> ,<br><b>2018</b> , 8, 1800069       |
| NiO  FTO                                             | 47              | 6.7/2.7        | -       | 85.3                             | <i>J. Solid State Electrochem.</i> , <b>2021</b> ,<br>25, 821 |
| WO <sub>3</sub>   NiO                                | 46              | 3.1/4.6        | 2500    | 90                               | <i>Sci. Rep.</i> , <b>2020</b> , 10,<br>8430                  |
| NiO  Li <sub>4</sub> Ti <sub>5</sub> O <sub>12</sub> | 55              | 7.4/6.5        | 600     | -                                | <i>J. Mater. Chem. A</i> ,<br><b>2021</b> , 9, 6451           |
| NiO  MnO <sub>2</sub>                                | 57              | 12/12.1        | 200     | 28.5                             | <i>J. Mater. Chem. C</i> ,<br><b>2021</b> , 9, 14378          |
| NiO  TiO <sub>2</sub>                                | 80.3            | 34.8/34.2      | -       | 31.7                             | <b>This work</b>                                              |
